# Supplementary material for: Biocompatible succinic acid-based polyesters for potential biomedical applications: fungal biofilm inhibition and mesenchymal stem cell growth
Source: Royal Society of Chemistry journal article supplement (doi:10.1039/c5ra15858c), 2015-01-01
Supplement: c5ra15858c1.pdf [file c5ra15858c1.pdf]

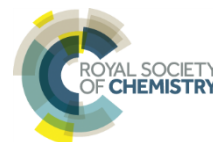

## Biocompatible succinic acid based polyesters for potential biomedical applications: fungal biofilm inhibition and mesenchymal stem cells growth

E. Jäger,<sup>a,b\*</sup> R.K. Donato,<sup>c,\*</sup> M. Perchacz,<sup>a,b</sup> A. Jäger,<sup>a,b</sup> F. Surman,<sup>a</sup> A. Höcherl,<sup>a</sup> R. Konefał,<sup>a,b</sup> K.Z. Donato,<sup>c</sup> C.G. Venturini,<sup>a</sup> V.Z. Bergamo,<sup>d</sup> H.S. Schrekker,<sup>c</sup> A.M. Fruentefria,<sup>d</sup> M.G. Raucci,<sup>e</sup> L. Ambrosio<sup>e</sup> and P. Štěpánek<sup>a</sup>

<sup>a</sup> Institute of Macromolecular Chemistry v.v.i., Academy of Sciences of the Czech Republic, Heyrovsky Sq. 2, 162 06 Prague 6, Czech Republic.

<sup>b</sup> Charles University Prague, Faculty of Natural Sciences, Hlavova 2030, Prague 12840 2, Czech Republic.

<sup>c</sup> Laboratory of Technological Processes and Catalysis, Institute of Chemistry, Universidade Federal do Rio Grande do Sul. Av. Bento Gonçalves 9500, Porto Alegre, RS, CEP: 91.501-970, Brazil.

<sup>d</sup> Laboratory of Applied Mycology, Department of Analysis, Faculty of Pharmacy, Universidade Federal do Rio Grande do Sul, Av. Ipiranga 2752, Porto Alegre, RS, CEP: 90.610-000, Brazil.

<sup>e</sup> Institute of Polymers, Composites and Biomaterials, National Research Council of Italy, Mostrad'Oltremare Pad.20, Viale Kennedy 54, Naples, Italy.

Email: [jager@imc.cas.cz](mailto:jager@imc.cas.cz); [donatork@gmail.com](mailto:donatork@gmail.com)

Tel: +420 296 809 322;

## Thermogravimetric analysis (TGA) and the derivative thermal analysis (DTG)

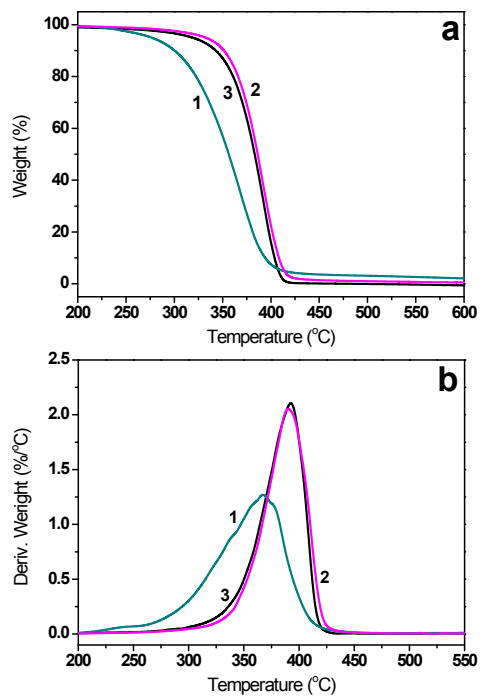

Fig. S1. TGA (a) and DTG (b) of the polyesters (1) PES, (2) PPS and (3) PBS.
